# Supplementary material
Source: Research Square preprint supplement (doi:10.21203/rs.3.rs-9102745/v1)
Supplement: Supplementary file 1 [file 35cf513f46a8b166f6d43439.docx]

| Table S1. Cell survival rates of AGS gastric cancer cells treated with different concentrations of 5-FU at different time cut-off points | | | | | | | | | | |
| --- | --- | --- | --- | --- | --- | --- | --- | --- | --- | --- |
| 5-FU | 0h |  | 24h |  | 48h |  | 72h |  | 96h |  |
|  | R(%) | *P* value | R(%) | *P*  value | R(%) | *P*  value | R(%) | *P* value | R(%) | *P* value |
| Control | 100 |  | 100 |  | 100 |  | 100 |  | 100 |  |
| 2μM | 100 | 0.93 | 136 | ＜0.05 | 107 | 0.12 | 90 | ＜0.05 | 92.3 | ＜0.05 |
| 4μM | 98 | 0.62 | 119 | ＜0.05 | 95.6 | 0.2 | 76.5 | ＜0.05 | 68.9 | ＜0.05 |
| 8μM | 99.7 | 0.92 | 110 | 0.03 | 79.9 | ＜0.05 | 62.4 | ＜0.05 | 53.4 | ＜0.05 |
| 16μM | 97 | 0.14 | 99.5 | 0.90 | 67.6 | ＜0.05 | 53.9 | ＜0.05 | 42.6 | ＜0.05 |
| 32μM | 101.6 | 0.42 | 84.4 | ＜0.05 | 59.7 | ＜0.05 | 43.8 | ＜0.05 | 33.9 | ＜0.05 |
| 64μM | 99.8 | 0.95 | 70.2 | ＜0.05 | 51.7 | ＜0.05 | 35.6 | ＜0.05 | 26.5 | ＜0.05 |
| 128μM | 99.4 | 0.72 | 29 | ＜0.05 | 13.9 | ＜0.05 | 8.1 | ＜0.05 | 23.5 | ＜0.05 |
| R：Average survival rate h：hour | | | | | | | | | | |
