# Supplementary material
Source: Research Square preprint supplement (doi:10.21203/rs.3.rs-9102745/v1)
Supplement: Supplementary file 2 [file b5d80dfbbbac01adc84233b7.docx]

| Table S3. Cell survival rate of AGS gastric cancer cells treated with apatinib | | | | | | | | | | |
| --- | --- | --- | --- | --- | --- | --- | --- | --- | --- | --- |
| Apatinib | 0h |  | 24h |  | 48h |  | 72h |  | 96h |  |
|  | R  (%) | *P* value | R  (%) | *P* value | R  (%) | *P*  value | R  (%) | *P*  value | R  (%) | *P*  value |
| control group | 100 |  | 100 |  | 100 |  | 100 |  | 100 |  |
| 10nM | 100 | 0.65 | 120 | ＜0.05 | 115 | ＜0.05 | 111 | ＜0.05 | 116 | ＜0.05 |
| 20nM | 99.1 | 0.27 | 122 | ＜0.05 | 123 | ＜0.05 | 110 | ＜0.05 | 122 | ＜0.05 |
| 40nM | 100 | 0.53 | 115 | ＜0.05 | 128 | ＜0.05 | 107 | ＜0.05 | 125 | ＜0.05 |
| 80nM | 100 | 0.57 | 107 | 0.07 | 114 | ＜0.05 | 113 | ＜0.05 | 131 | ＜0.05 |
| 160nM | 100 | 0.71 | 106 | 0.07 | 117 | ＜0.05 | 105 | 0.053 | 127 | ＜0.05 |
| 320nM | 101 | 0.14 | 89.6 | ＜0.05 | 111 | ＜0.05 | 75.0 | ＜0.05 | 101 | 0.55 |
| 640nM | 101 | 0.80 | 54.9 | ＜0.05 | 46.7 | ＜0.05 | 7.21 | ＜0.05 | 52 | ＜0.05 |
| R：Average survival rate h：hour | | | | | | | | | | |
