# Supplementary material
Source: Research Square preprint supplement (doi:10.21203/rs.3.rs-9102745/v1)
Supplement: Supplementary file 3 [file bc79c9b87fd123961d1a89d9.docx]

| Table S2. Cell survival rate of AGS gastric cancer cells treated with cisplatin | | | | | | | | | | |
| --- | --- | --- | --- | --- | --- | --- | --- | --- | --- | --- |
| Cisplatin | 0h |  | 24h |  | 48h |  | 72h |  | 96h |  |
|  | R  (%) | *P* value | R  (%) | *P*  value | R  (%) | *P* value | R  (%) | *P* value | R  (%) | *P*  value |
| control group | 100 |  | 100 |  | 100 |  | 100 |  | 100 |  |
| 2μM | 97.7 | 0.10 | 131 | ＜0.05 | 102 | 0.51 | 102 | 0.38 | 102 | 0.29 |
| 4μM | 95.9 | 0.25 | 119 | ＜0.05 | 93.3 | 0.09 | 83.5 | ＜0.05 | 86.9 | ＜0.05 |
| 8μM | 98.9 | 0.47 | 121 | ＜0.05 | 74.3 | ＜0.05 | 41.9 | ＜0.05 | 31.2 | ＜0.05 |
| 16μM | 98.4 | 0.06 | 116 | ＜0.05 | 56.9 | ＜0.05 | 22.0 | ＜0.05 | 16.3 | ＜0.05 |
| 32μM | 98.5 | 0.09 | 80.1 | ＜0.05 | 28.1 | ＜0.05 | 10.5 | ＜0.05 | 12.2 | ＜0.05 |
| 64μM | 98.5 | 0.14 | 27.3 | ＜0.05 | 13.9 | ＜0.05 | 7.15 | ＜0.05 | 9.2 | ＜0.05 |
| 128μM | 98.9 | 0.18 | 12.3 | ＜0.05 | 13.9 | ＜0.05 | 7.38 | ＜0.05 | 8.9 | ＜0.05 |
| R：Average survival rate h：hour | | | | | | | | | | |
