# Supplementary material
Source: Research Square preprint supplement (doi:10.21203/rs.3.rs-9102745/v1)
Supplement: Supplementary file 4 [file cedd1eb627d30d20e05e2fdc.docx]

| **Table S5. Effects of Cytotoxicity and Anti vascular Drugs on PD-L1 Protein Expression in AGS Gastric Cancer Cells** | | | | |
| --- | --- | --- | --- | --- |
| Group | GAPDH | PD-L1 | PD-L1/GAPDH | *P* value |
| control group | 31764.187 | 16653.409 | 0.524 |  |
|  | 31922.137 | 16715.116 | 0.524 |  |
|  | 31506.238 | 16674.409 | 0.529 |  |
| 5-FU(64uM) | 31663.551 | 37140.723 | 1.173 | ＜0.05 |
|  | 31482.187 | 37874.208 | 1.203 |  |
|  | 31342.673 | 38459.279 | 1.227 |  |
| Apatinib(320nM) | 31227.359 | 32451.43 | 1.039 | ＜0.05 |
|  | 31023.602 | 30835.752 | 0.994 |  |
|  | 31011.844 | 30119.267 | 0.971 |  |
| Apatinib(16uM) | 31058.894 | 28446.53 | 0.916 | ＜0.05 |
|  | 31262.48 | 29265.551 | 0.936 |  |
|  | 31772.823 | 29425.137 | 0.926 |  |
