# Supplementary material
Source: Research Square preprint supplement (doi:10.21203/rs.3.rs-9102745/v1)
Supplement: Supplementary file 5 [file fa4662ced28189d31906f30a.docx]

| **Table S4. Effects of Cytotoxicity and Anti vascular Drugs on PD-L1 mRNA Expression in AGS Gastric Cancer Cells** | | | | | | | |
| --- | --- | --- | --- | --- | --- | --- | --- |
| Group | GAPDH | PD-L1 | 10.83 |  |  |  |  |
| Ct | Ct | ΔCt | ΔΔCt | 2-ΔΔCt | 2-ΔΔCt average | *P* value |
| control group | 16.2 | 26.9 | 10.7 | -0.09 | 1.06 | 1.00 |  |
| 16.3 | 27.3 | 10.9 | 0.12 | 0.92 |
| 16.2 | 27.0 | 10.8 | -0.03 | 1.02 |
| 5-FU 4uM | 16.6 | 27.2 | 10.7 | -0.16 | 1.12 | 1.25 | 0.47 |
| 16.2 | 26.9 | 10.7 | -0.18 | 1.13 |
| 16.4 | 26.7 | 10.3 | -0.58 | 1.49 |
| 5-FU 16uM | 16.6 | 26.5 | 9.98 | -0.85 | 1.80 | 1.41 | 0.16 |
| 16.7 | 27.0 | 10.3 | -0.53 | 1.44 |
| 16.1 | 26.9 | 10.8 | 0.01 | 0.99 |
| 5-FU 64uM | 17.1 | 26.7 | 9.6 | -1.190 | 2.28 | 2.23 | 0.005 |
| 16.5 | 26.4 | 10.0 | -0.87 | 1.83 |
| 17.2 | 26.6 | 9.5 | -1.36 | 2.57 |
| Apatinib  320 uM | 17.1 | 26.8 | 9.7 | -1.09 | 2.13 | 1.76 | 0.023 |
| 17.0 | 27.1 | 10.1 | -0.78 | 1.72 |
| 16.7 | 27.0 | 10.3 | -0.51 | 1.42 |
| Apatinib  640 uM | 16.6 | 27.1 | 10.5 | -0.29 | 1.22 | 1.37 | 0.047 |
| 16.6 | 26.8 | 10.1 | -0.69 | 1.61 |
| 17.0 | 27.5 | 10.5 | -0.35 | 1.27 |
| Cisplatin  16uM | 17.0 | 27.2 | 10.1 | -0.72 | 1.65 | 1.5851049 | 0.0008 |
| 16.7 | 26.9 | 10.3 | -0.58 | 1.49 |
| 16.5 | 26.7 | 10.1 | -0.69 | 1.61 |
| Cisplatin  32uM | 16.1 | 26.9 | 10.8 | 0.000 | 1.00 | 0.82 | 0.18 |
| 16.3 | 27.5 | 11.1 | 0.28 | 0.82 |
| 15.8 | 27.3 | 11.5 | 0.62 | 0.65 |
| Cisplatin  64uM | 16.2 | 26.7 | 10.5 | -0.29 | 1.2203 | 1.17 | 0.095 |
| 16.4 | 27.2 | 10.8 | -0.06 | 1.04 |
| 16.5 | 27.0 | 10.5 | -0.320 | 1.25 |
